# Supplementary material
Source: Springer Nature journal article supplement (https://www.springermedizin.de/resource/supplementary/12916_2011_445_MOESM1_ESM.pdf/9599716)

TARGET

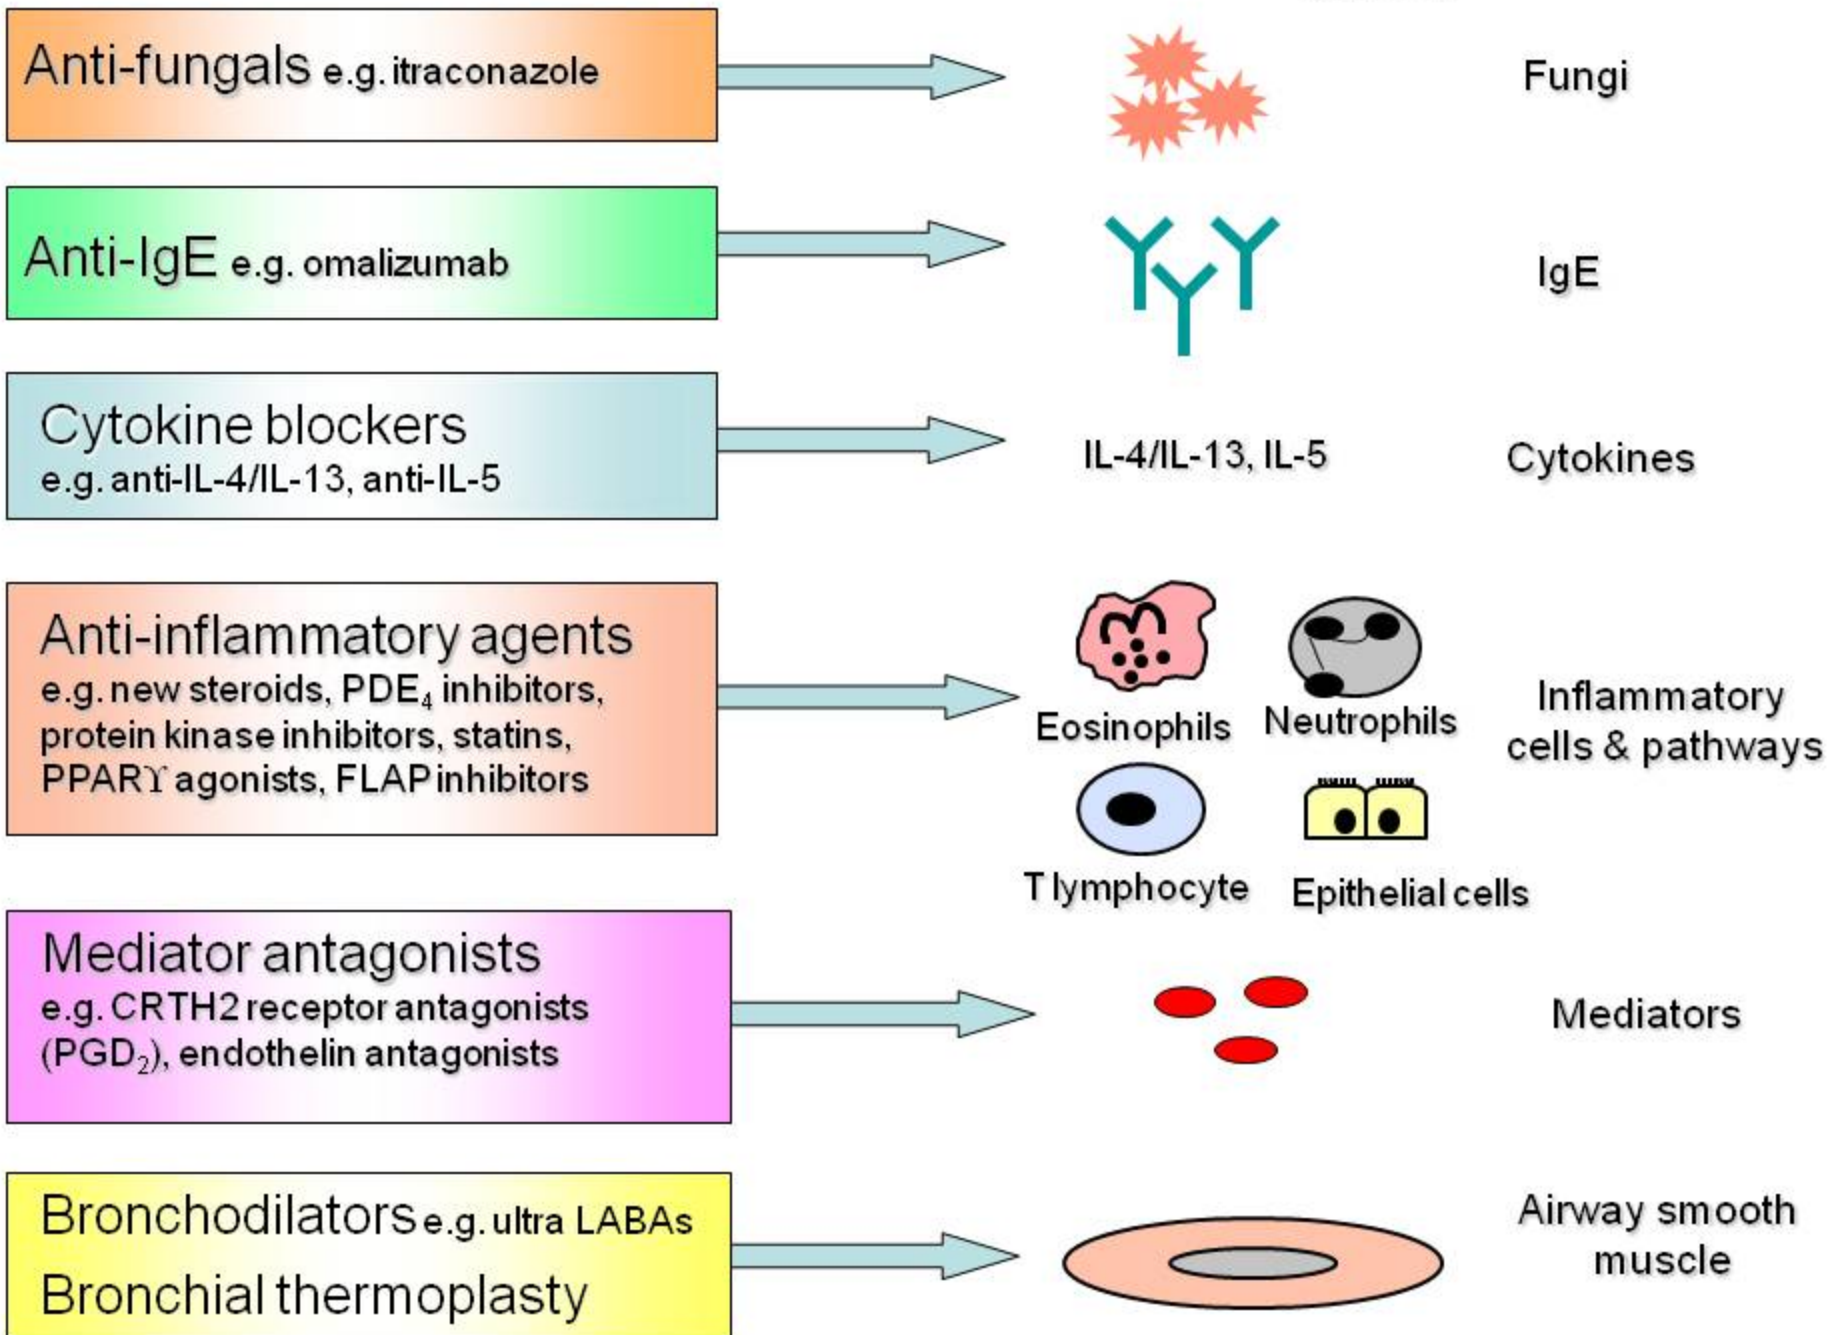

Supplement: MOESM1 [file 9599716]
